# Supplementary material for: Direct detection of polycyclic aromatic hydrocarbons on a molecular composition level in summertime ambient aerosol via proton transfer reaction mass spectrometry
Source: Copernicus journal article supplement (doi:10.5194/ar-2-225-2024), 2024-07-18
Supplement: Supplementary file 1 [file ar-2-225-2024-supplement.pdf]

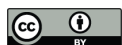

*Supplement of*

**Direct detection of polycyclic aromatic hydrocarbons on a molecular composition level in summertime ambient aerosol via proton transfer reaction mass spectrometry**

**Tobias Reinecke et al.**

*Correspondence to:* Markus Müller ([markus.mueller@ionicon.com](mailto:markus.mueller@ionicon.com))

The copyright of individual parts of the supplement might differ from the article licence.

## Supporting Figures

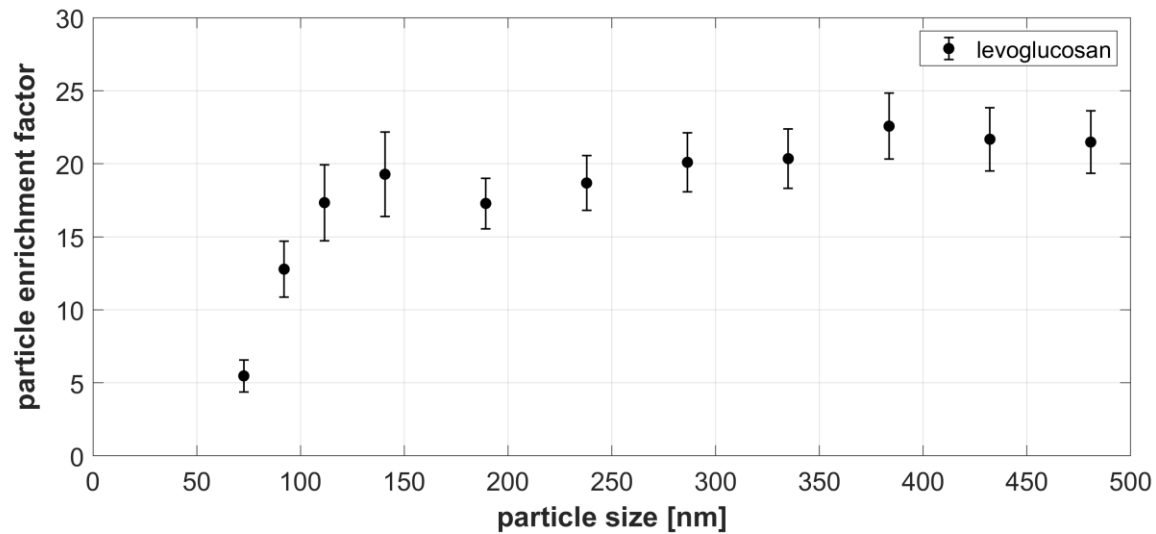

5 **Figure S1: Particle size dependent enrichment factor of the CHARON particle inlet as measured for atomized and size-selected levoglucosan particles.**

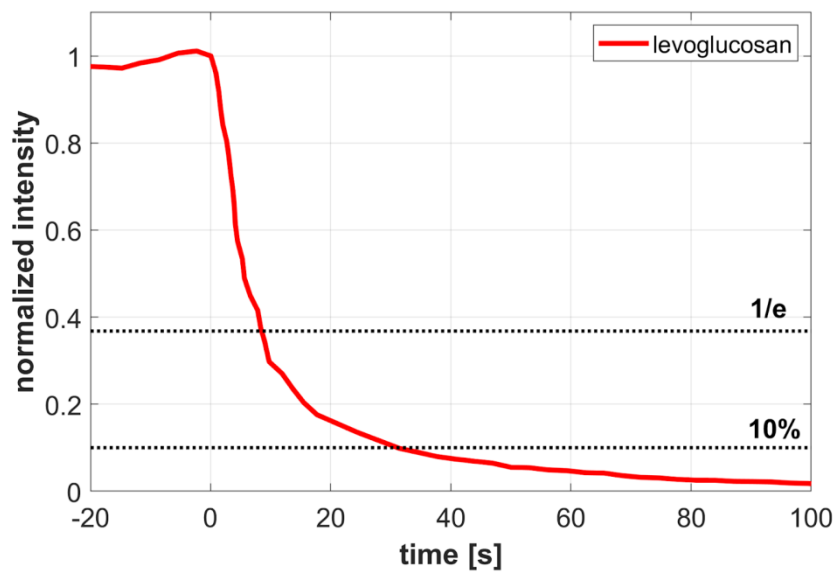

10 Figure S2: Response of the CHARON FUSION PTR-TOF 10k for atomized polydisperse levoglucosan particles. Levoglucosan mass concentrations were in the range of  $0.5 \mu\text{g m}^{-3}$ . A constant concentration of levoglucosan particles was supplied for a few minutes prior to switching to CHARON HEPA mode to follow the signal decay.  $1/e$  decay times equal to 8 s, a decay down to 10% equals to 31 s.

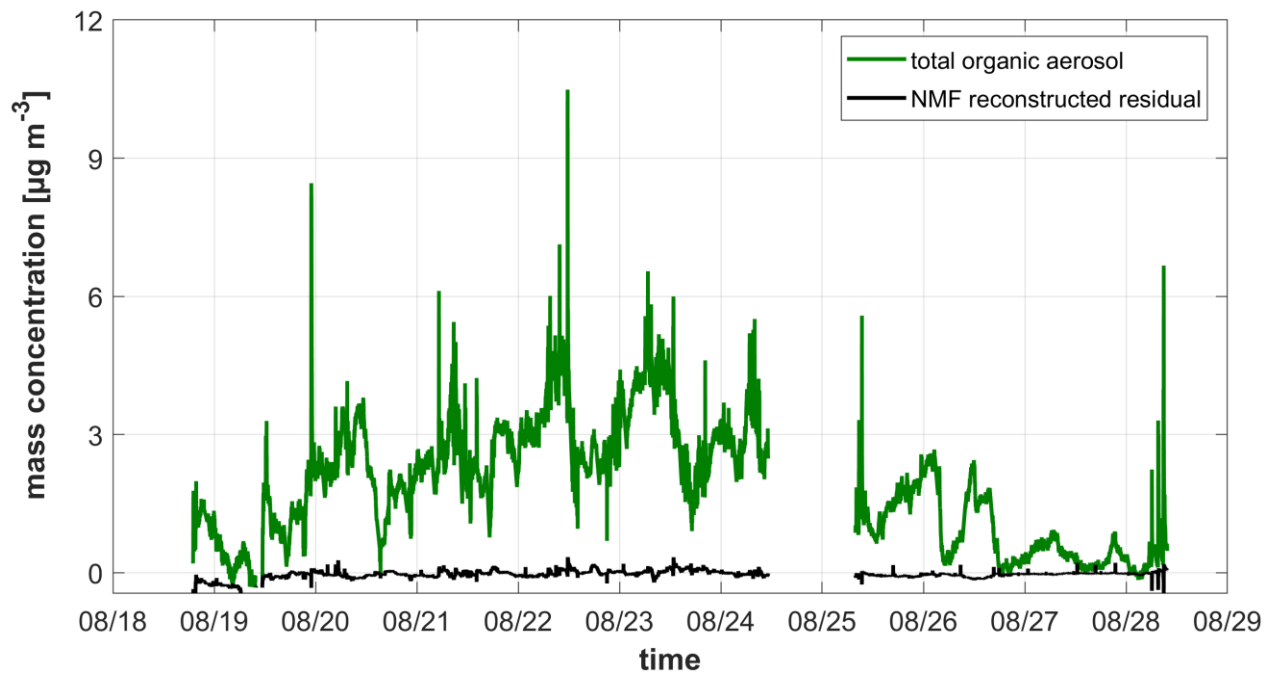

15 Figures S3: Visualization of the total measured organic aerosol and the respective NMF reconstructed residual (i.e. the total measured organic aerosol minus the sum of all ten identified NMF factors).

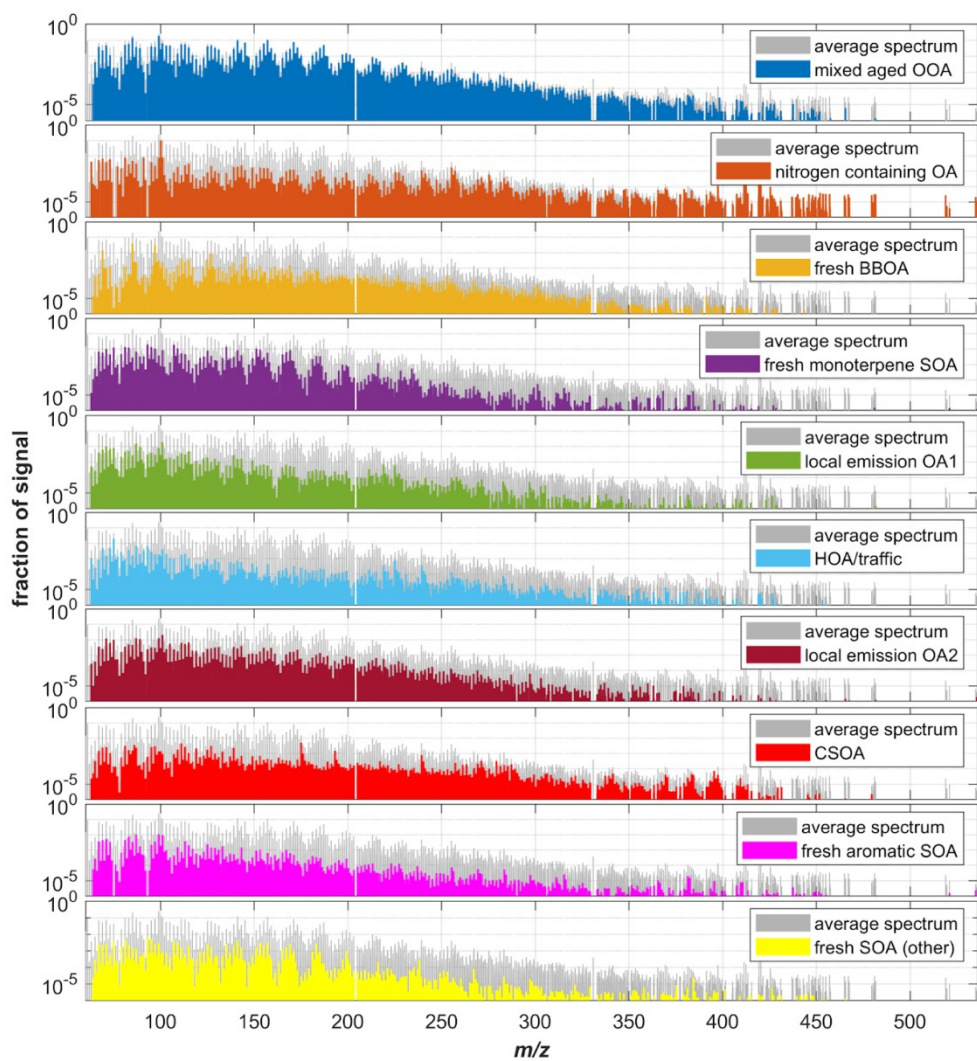

20 **Figures S4: Mass spectra of all identified factors (in respective colors). Grey bars illustrate the average mass spectrum as recorded during the entire measurement period.**

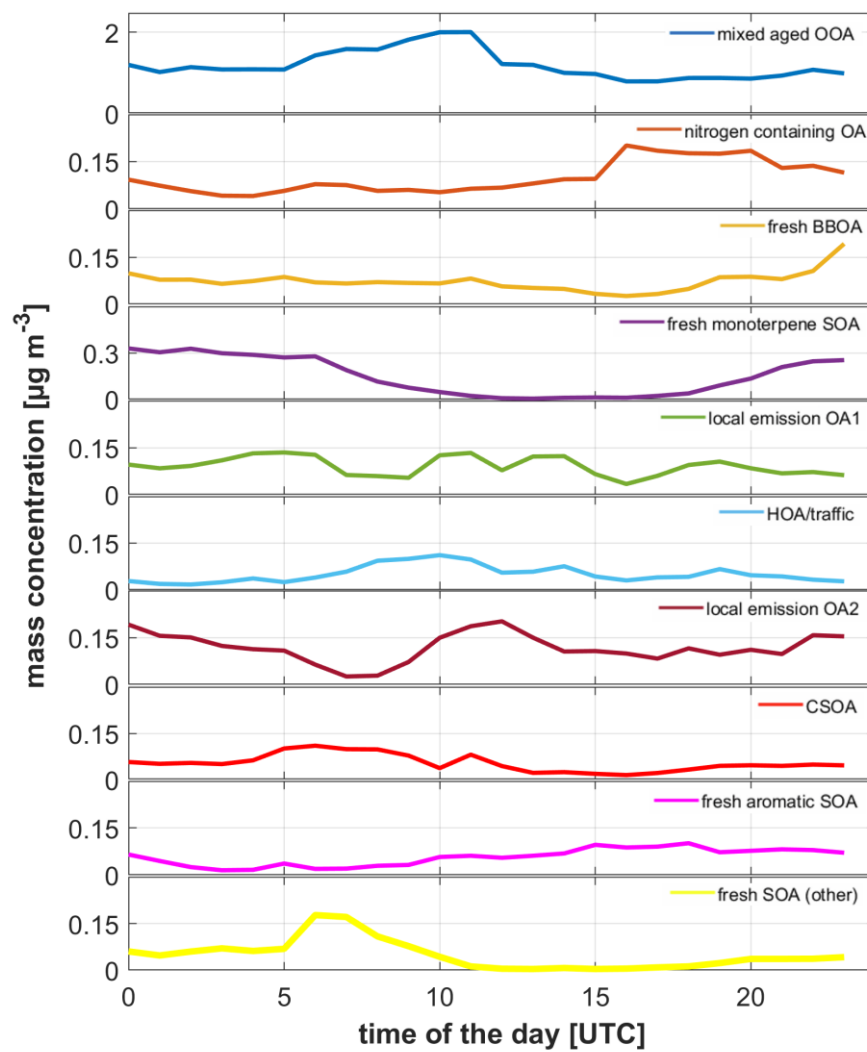

Figures S5: Diurnal variations of all identified factors.
